# Supplementary figures and images for: Luteinizing hormone causes MAP kinase-dependent phosphorylation and closure of connexin 43 gap junctions in mouse ovarian follicles: one of two paths to meiotic resumption
Source: Oxford University Press journal article supplement (doi:10.1242/dev.025494), 2008-09-05

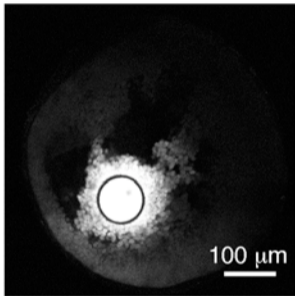

10'

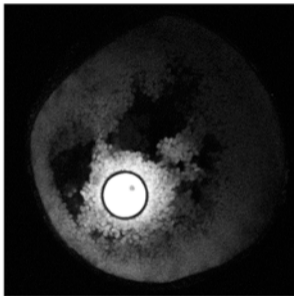

15'

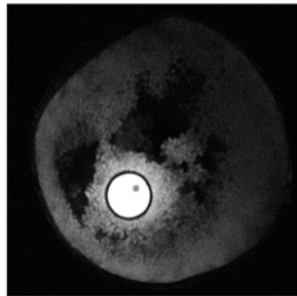

20'

Supplement: dev025494-sup-025494-figs1.pdf [file dev025494-sup-025494-figs1.pdf]

A. No LH

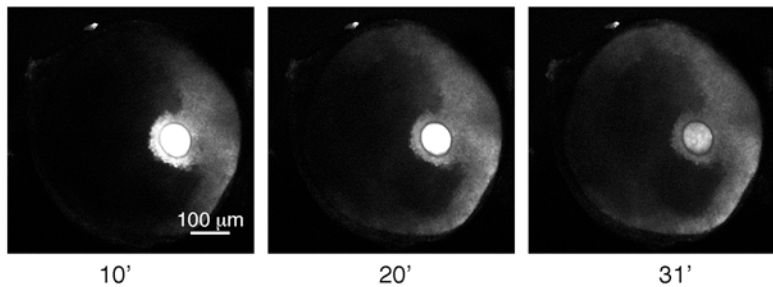

B. LH, 1 hour

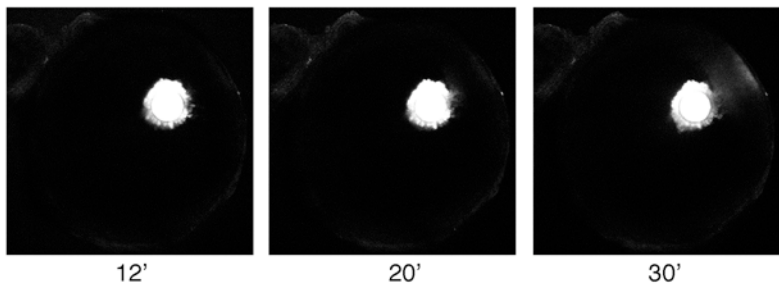

C. LH, 5 hours

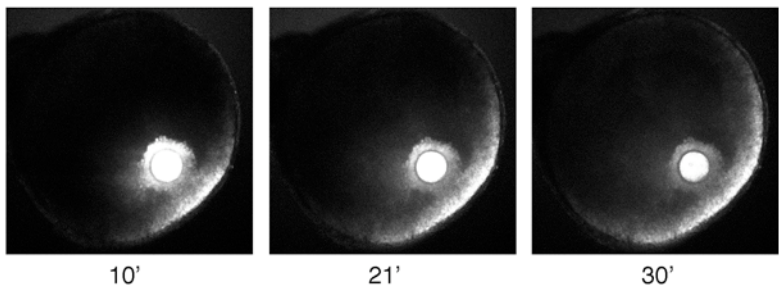

Supplement: dev025494-sup-025494-figs2.pdf [file dev025494-sup-025494-figs2.pdf]

cumulus  
(~100  $\mu\text{m}$  depth)

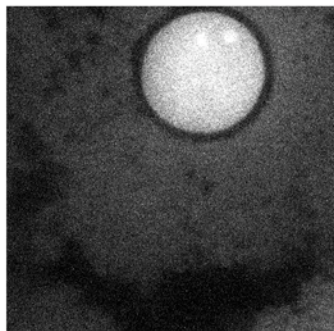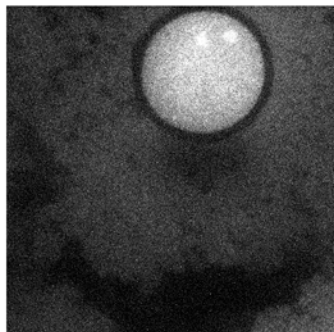

mural  
(~20  $\mu\text{m}$  depth)

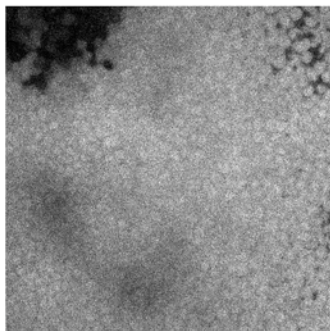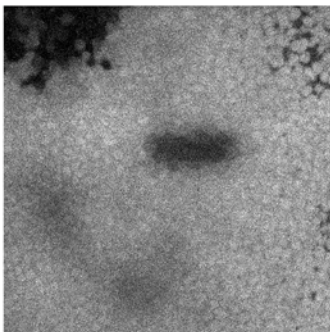

before bleach

~2 seconds  
after bleach

Supplement: dev025494-sup-025494-figs3.pdf [file dev025494-sup-025494-figs3.pdf]
